# Supplementary material for: A generic technology for long-acting intravitreal therapy
Source: Research Square preprint supplement (doi:10.21203/rs.3.rs-8408708/v1), 2026-01-21
Supplement: Supplementary file 1 [file 5bccc0360770d12b8f67bc11.docx]

**A generic technology for long-acting intravitreal therapy**

Sujin Hoshi1, Eric Schneider2, Akiko Oota-Ishigaki1, Tetsuro Oshika1, Rocio Del Valle Fernandez2, Guillermo Hails2, Daniel Santi2

1Department of Ophthalmology, Institute of Medicine, University of Tsukuba, Ibaraki, Japan

2Prolynx, Emeryville, California, United States

This PDF file includes:

Materials and Methods

1. Preparation of N3-linker-5-(aminoacetamido) fluorescein

2. Preparation and acylation of amino microsphere

3. Preparation of fluorescein-microspheres

4. Preparation of N3-linker-bevacizumab

5. Preparation of bevacizumab- microspheres

6. In vitro release kinetics and reverse gelation of acylated microspheres and MS-fluorescein conjugates.

7. In vitro release kinetics and reverse gelation of MS-bevacizumab

8. Intravitreal dosing of MS-conjugates in rabbit eyes.

9. Ophthalmologic Examination

10. Enucleation and collection of vitreous

11. Measurement of PEG and fluorescein in rabbit vitreous

12. Intravitreal dosing of MS-bevacizumab in rabbit eyes.

13. Measurement of bevacizumab in rabbit vitreous

**Materials and Methods**

**1. Preparation of N3-linker-5-(aminoacetamido) fluorescein**

N3-linker-5-(aminoacetamido) fluoresceins were prepared from the linker-succinimidyl carbonates and 5-(aminoacetamido) fluorescein (Invitrogen) as previously described (1).

**2. Preparation and acylation of amino microsphere**

All amino microspheres were prepared as previously described (2). Amino microspheres for conjugates **1-6** were prepared from 10 kDa 4-arm amino-PEG monomers and contained ε-Lys linker carbamates with the modulator GDM1-(CH3CH2)2NSO2 or GDM1-CH3SO.  Amino microspheres for conjugates **7** were prepared from 20 kDa 4-arm amino-PEG monomers and contained ε-Lys linker carbamates with the modulator GDM1-(CH3)2NSO2.

Acylated and BCN-derivatized microspheres were prepared as previously reported for other derivatized microspheres, using either acetic anhydride or BCN-OSu ((1R,8S,9s)-bicyclo[6.1.0]non-4-yn-9-ylmethyl succinimidyl carbonate) (2).

**3. Preparation of fluorescein-microspheres**

A solution of N3-fluorescein-linker (Mod=GDM2 PhSO2, GDM2 MeSO2, GDM1 Me2NSO2 or stable as described in table 1, 1.8 μmol, 0.3 eq, 1.2 mL) was added to 3.5 mL of MS-BCN slurry (Mod=GDM1-(CH3CH2)2NSO2) containing 6 μmol BCN in acetonitrile and mixed end over end for 20 hr at ambient temperature. The remaining unreacted BCN was capped by addition of 1 eq (6 μmol) PEG8-azide and reacted for 8 hrs. The final microspheres were exchanged into 10% w/v trehalose dihydrate, 10 mM histidine, 0.01% polysorbate 20 pH 5.5. The fluorescein concentration and PEG content were determined as previously described (fluorescein ε491 = 80000 M-1cm-1) (2).

**4. Preparation of N3-linker-bevacizumab**

Bevacizumab (208 μmol, 312 mg, 170 μM) was combined with N3-PEG4-linker(GDM1 PhSO2)-OSu (208 μmol, 170 uM, 1 molar equivalent) in a total volume of 12.6 mL 50 mM phosphate buffer, pH 6.2. After 14 hours incubation at ambient temperature a 1 μl sample was mixed with 1 μl of 1 mM PEG40kDa-BCN for 4 hours at 37 ºC and later analyzed by SDS PAGE shift assay, indicating an acylation yield of 47% free bevacizumab, 32% mono-acylated, 20% di-acylated, and 1% tri-acylated; the mono-acylated form was 60% of the total acylated protein. The reaction mixture was concentrated to 7.5 mL using Amicon 3k MWCO filters and buffer-exchanged with PD-10 desalting columns (Cytiva, cat # 17-0851-01) preequilibrated with 25 mM NaCitrate, pH 6, 500 mM NaCl, 0.05 %w/v Tween-20. The resulting sample was filter-sterilized and concentrated using 3 k MWCO Amicon filters, to a final volume of 2 mL containing 135 mg/ml bevacizumab.

**5. Preparation of MS-bevacizumab**

N3-linker-bevacizumab (2 mL, 151 mg, 108 nmol) was added to MS-BCN (2 mL, 3 μmol BCN, crosslink mod=e-GDM1 DMS, 20kDa PEG monomers) in a final volume of 4 mL 50 mM phosphate buffer, pH 6.2. The reaction was gently mixed at ambient temperature for 150 hours. Following incubation, the reaction was washed with reaction buffer to remove unreacted protein and one equivalent (3 μmol) N3-PEG7 was added to the slurry and mixed for 20 hours at ambient temperature to cap unreacted BCN sites. The MS slurry was washed with reaction buffer to remove excess N3-PEG7 and the final loading yield was assessed by dissolving a sample of MS~bevacizumab in NaOH and measuring released bevacizumab by A280. The loading yield was 25 nmol bevacizumab/mg PEG, or 39 mg/mL slurry, a 25% overall yield compared to expected BCN sites.

**6. In vitro release kinetics and reverse gelation of acylated microspheres and MS-fluorescein conjugates.**

The release kinetics and reverse gelation time of the microsphere-fluorescein conjugates and acylated microspheres were determined as previously described under accelerated conditions as previously reported (2). Reverse gelation times were measured at 37C in the following buffers: **1**,100 mM Bicine pH 8.4; **2,** 100 mM Borate pH 9.4; **3, 4, 5** and **6,** 100 mM CAPS pH 10.0. Fluorescein release kinetics were measured at 37C in the following buffers: **3,** 100 mM Bicine pH 8.4; **4, 5, 6,** 100 mM Borate pH 9.4. Reaction samples were collected at timepoints between 0 and 120 hr. PEG content for time to reverse gelation was determined as described previously (2). Fluorescein content was determined by measuring the absorbance on an HP 8453 UV-Vis spectrophotometer.

**7. In vitro release kinetics and reverse gelation of MS-bevacizumab**

The in vitro release kinetics of the MS~bevacizumab (Mod=GDM1 PhSO2) conjugate were measured under accelerated conditions as previously reported (2) in 100 mM Sodium Borate, pH 9.4 at 37 ºC. Sample slurries were diluted 10-fold and supernatant aliquots were taken periodically for over 144 hours. PEG content for time to reverse gelation was determined as described previously (2). Released bevacizumab was determined by measurement of absorbance at 280 nm on an HP 8453 UV-vis spectrophotometer. The in vitro release t1/2 of bevacizumab at pH 9.4, 37 °C was 4.4 hours with a tRG of 35 hours, corresponding to a t1/2 of 18.3 days and a tRG of 145 days at pH 7.4, 37 °C.

**8. Intravitreal dosing of MS-conjugates in rabbit eyes.**

All applicable institutional and governmental regulations concerning the ethical use of animals were followed. The study was approved by the Ethics Committee on Animal Experimentation of the University of Tsukuba (No.22-099). The study conformed to the ARVO Statement for the Use of Animals in Ophthalmic and Vision Research.

New Zealand white rabbits (weighing 1.5–2.5 kg; Kitayama Labes Ltd., Nagano, Japan) were used for all experiments with each pair of eyes used for duplicates at each timepoint and procedures were performed using sterile techniques. The animals were anesthetized with intramuscular injections of ketamine hydrochloride (35 mg/kg) and xylazine (5 mg/kg). Topical anesthesia (0.4% oxybuprocaine hydrochloride drops) was also applied to the eyes. The pupils were dilated with topical 0.5% phenylephrine hydrochloride and 0.5% tropicamide. The eyelids and conjunctiva were rinsed with 5% povidone–iodine. A sterile eyelid speculum was inserted, and 50μL of MS-conjugate was injected into the vitreous cavity from 2 mm behind the corneal limbs using a 29-gauge needle.

**9. Ophthalmologic Examination**

Prior to the examinations, topical anesthesia was administered using 0.4% oxybuprocaine hydrochloride eye drops. The pupils were dilated with topical 0.5% phenylephrine hydrochloride and 0.5% tropicamide. Anterior segment examinations were performed using a hand-held slit lamp (Metori-50, Izawa Opt Co., Ltd. Japan), and fundus examinations were conducted with an indirect ophthalmoscope (BS-III, Neitz Instruments Co., Ltd., Japan) and a 40D lens for fundus observation (L40LC, Volk Optical Inc., USA). In addition, photographic documentation was obtained using a smartphone equipped with a camera (iPhone14, Apple Inc., USA).

Intraocular pressure was measured using a rebound tonometer (TonoVet Plus®; Icare Finland Oy, Helsinki, Finland) preoperatively, and during each postoperative examination. The tonometer was used according to the manufacturer’s instructions with the magnetic probe in a horizontal position. All measurements were performed by the same technician who was masked to treatment group. Three measurements, each consisting of the mean of six recordings, were taken of each eye. General anesthesia was not needed for IOP measurement.

**10. Enucleation and collection of vitreous**

Animals were euthanized at each collection timepoint and ocular tissues were collected for pharmacokinetic analysis following the previously reported methods (3). Briefly, immediately following enucleation, the eyeballs were frozen and separated into three compartments: the vitreous, the aqueous humor, and the retina.

**11. Measurement of PEG and fluorescein in rabbit vitreous**

An equivalent volume of 500 mM NaOH (1 mL per 1 mg vitreous sample) was added to the vitreous samples and heated at 70C for 25 minutes. The treated samples were centrifuged at 4000 rpm to pellet any insoluble material. For the fluorescein content, treated samples (100 μL) were loaded onto a 96 well plate and fluorescence was measured on a Spectra Max i3 at excitation 485 nm/emission 535 nm (Molecular Devices). For PEG content, treated samples were diluted 2.5-fold in water (100 μL digest + 150 μL water) followed by a 33.3-fold dilution into 0.5 M perchloric acid (30 μL water dilution into 970 uL 0.5M perchloric acid). Analysis of the PEG content was determined in the perchloric acid samples following BaCl2/I2 previously described (2).

**12. Intravitreal dosing of MS-bevacizumab in rabbit eyes.**

Briefly, New Zealand white rabbits received an intravitreal injection of 1.25 mg (0.05 mL) of MS~bevacizumab into the left eye and the same amount of free drug into the right eye. Both eyes were enucleated after 1 day and 1, 2, 4-, 8-, 12- and 16-weeks post treatment (n=3/time point).

**13. Measurement of bevacizumab in rabbit vitreous**

Rabbit vitreous samples were centrifugated at 500 g for 10 min at 4ºC to pellet any insoluble material. A 100 uL aliquot was then centrifuged again at 20,000 g for 5 min at 4ºC. Bevacizumab levels were measured by ELISA following the manufacturer instructions (Bevacizumab (Avastin®) Pharmacokinetic ELISA Kit, AffinityImmuno, Cat. # EL-1611-021, LOD 1.5 ng/mL) and using Simulated Vitreous Humor (Biochemazone, Cat# BZ277) to prepare vitreous sample dilutions as well as standard curve dilutions.

**References:**

1. D. Santi et al., Predictable and tunable half-life extension of therapeutic agents by controlled chemical release from macromolecular conjugates, Proc. Natl. Acad. Sci. U.S.A. 109 (16) 6211-6216 (2012).
2. J. Henise et al., High-throughput, aseptic production of injectable Tetra-PEG hydrogel microspheres for delivery of releasable covalently bound drugs. Engineering Reports 2:e12213, 1-13 (2020).
3. S. Ahn et al., Use of Rabbit Eyes in Pharmacokinetic Studies of Intraocular Drugs. J Vis Exp. 113, 53878 (2016).
